# Supplementary material for: Effects of Unloading Rate on Energy Evolution Mechanism in the Single‐Side Unloading Failure of Highly Stressed Marble
Source: Hindawi journal article supplement (doi:10.1155/2020/4185624), 2020-01-01
Supplement: f1 [file 4185624.f1.xlsx]

## Sheet: Sheet1
nstantaneous	power（kN）	time(s)	60kN/min	power（kN）	time（s）	120kN/min	power（kN）	time（s）	300kN/min	power（kN）	time（s）
	200022	996.3		200088	1000.1		200001	1164.44		200001	1151.68
	195837	996.44		199926	1000.14		199938	1164.5		199938	1151.72
	191586	996.5		199830	1000.24		199938	1164.56		199938	1151.82
	179955	996.56		199704	1000.28		199905	1164.64		199971	1151.88
	169632	996.64		199479	1000.34		199971	1164.7		199809	1151.96
	151959	996.7		199512	1000.38		199971	1164.74		199746	1152.02
	111246	996.74		199353	1000.44		199938	1164.78		199617	1152.1
	97470	996.8		199734	1000.56		199971	1164.78		199458	1152.16
	83763	996.86		199512	1000.6		200001	1164.84		199203	1152.2
	37422	996.92		199542	1000.64		200163	1165		198690	1152.26
	24705	997		199575	1000.74		200163	1165.06		198435	1152.32
	8022	997.06		199512	1000.8		200130	1165.14		198243	1152.38
	3804	997.1		199095	1000.86		200130	1165.2		197763	1152.46
	1728	997.2		198936	1000.92		200193	1165.24		197604	1152.52
	1278	997.24		199416	1000.96		200163	1165.34		197316	1152.6
	1248	997.3		198936	1001.06		200130	1165.38		197061	1152.66
	1854	997.36		198618	1001.1		200097	1165.44		196806	1152.7
	1536	997.42		198522	1001.14		200097	1165.5		196485	1152.76
	1152	997.5		198426	1001.24		200034	1165.56		196197	1152.82
	1728	997.56		198393	1001.3		200067	1165.64		196005	1152.88
	1311	997.6		198969	1001.36		200001	1165.7		195528	1152.96
	1407	997.7		198969	1001.42		199875	1165.74		195336	1153.02
	1152	997.74		198393	1001.46		199842	1165.84		195078	1153.1
	1599	997.8		198201	1001.56		199905	1165.88		194697	1153.16
	1536	997.86		198681	1001.6		199875	1165.94		194439	1153.2
	960	997.92		198648	1001.64		199905	1165.96		194055	1153.26
	735	998		198648	1001.74		199875	1166.08		193674	1153.32
	672	998.06		198489	1001.8		199875	1166.14		193578	1153.38
	576	998.1		197883	1001.86		199875	1166.2		193065	1153.46
				197850	1001.92		199809	1166.24		192969	1153.52
				198456	1001.96		199779	1166.34		192651	1153.56
				198360	1002.06		199683	1166.38		192234	1153.66
				197850	1002.1		199521	1166.42		191979	1153.7
				197850	1002.14		199395	1166.52		191562	1153.76
				197883	1002.24		199362	1166.58		191277	1153.82
				197883	1002.3		199299	1166.64		191019	1153.88
				197754	1002.36		199236	1166.7		190572	1153.96
				197658	1002.42		198948	1166.74		190413	1154.02
				197274	1002.46		198915	1166.84		190062	1154.1
				197274	1002.56		198786	1166.88		189774	1154.16
				197244	1002.6		198564	1167		189453	1154.2
				197148	1002.64		198468	1167.06		189102	1154.26
				197019	1002.74		198372	1167.14		188814	1154.32
				197052	1002.8		198213	1167.2		188592	1154.38
				197403	1002.86		198021	1167.24		188079	1154.46
				197244	1002.92		197988	1167.34		187887	1154.52
				196794	1002.96		197859	1167.38		187569	1154.6
				196890	1003.06		197667	1167.42		187281	1154.66
				197433	1003.1		197574	1167.52		186960	1154.7
				197403	1003.14		197508	1167.58		186609	1154.76
				197274	1003.24		197382	1167.64		186288	1154.82
				197115	1003.28		197253	1167.7		186096	1154.88
				196317	1003.34		197061	1167.74		185586	1154.96
				196317	1003.38		196965	1167.84		185427	1155.02
				196923	1003.44		196869	1167.88		185076	1155.06
				196731	1003.56		196614	1167.94		184818	1155.16
				196125	1003.6		196518	1168		184530	1155.2
				196155	1003.64		196551	1168.06		184149	1155.26
				196251	1003.74		196455	1168.14		183861	1155.32
				196347	1003.8		196326	1168.2		183669	1155.38
				196506	1003.86		196005	1168.24		183126	1155.46
				196251	1003.92		195879	1168.34		182964	1155.52
				196380	1003.96		195846	1168.38		182646	1155.6
				195708	1004.06		195654	1168.44		182358	1155.66
				195741	1004.1		195624	1168.5		182037	1155.7
				195678	1004.14		195462	1168.56		181623	1155.76
				195708	1004.24		195399	1168.64		181302	1155.82
				195582	1004.28		195240	1168.7		180951	1155.88
				195771	1004.34		195078	1168.74		180663	1155.96
				195708	1004.38		194952	1168.84		180471	1156.02
				195132	1004.44		194889	1168.88		180120	1156.1
				195390	1004.56		194664	1168.94		179895	1156.16
				195708	1004.6		194601	1169		179577	1156.2
				195804	1004.64		194472	1169.06		179193	1156.26
				195771	1004.74		194439	1169.14		178872	1156.32
				195612	1004.8		194343	1169.2		178458	1156.38
				194943	1004.86		193992	1169.24		178203	1156.46
				194973	1004.92		193737	1169.34		177945	1156.52
				195228	1004.96		193704	1169.38		177627	1156.56
				195228	1005.06		193770	1169.44		177372	1156.66
				194622	1005.1		193800	1169.5		177084	1156.7
				194589	1005.14		193545	1169.56		176667	1156.76
				194655	1005.24		193416	1169.64		176349	1156.82
				194622	1005.28		193290	1169.7		176094	1156.88
				195006	1005.34		193065	1169.74		175677	1156.96
				194877	1005.38		193002	1169.84		175485	1157.02
				194208	1005.44		192906	1169.88		175197	1157.1
				194142	1005.56		192651	1169.94		174909	1157.16
				194526	1005.6		192555	1170		174558	1157.2
				194367	1005.64		192489	1170.06		174207	1157.26
				194238	1005.74		192393	1170.14		173886	1157.32
				194079	1005.8		192297	1170.2		173727	1157.38
				194046	1005.86		192042	1170.24		173247	1157.46
				194112	1005.92		191979	1170.34		172959	1157.52
				193791	1005.96		191883	1170.38		172737	1157.6
				194175	1006.06		191628	1170.44		172386	1157.66
				194175	1006.1		191595	1170.5		172065	1157.7
				194208	1006.14		191532	1170.56		171714	1157.76
				194208	1006.24		191403	1170.64		171426	1157.82
				194079	1006.28		191307	1170.7		171171	1157.88
				193377	1006.34		191052	1170.74		170691	1157.96
				193281	1006.38		190956	1170.84		170532	1158.02
				193632	1006.44		190893	1170.88		170211	1158.1
				193695	1006.56		190701	1170.94		169923	1158.16
				193185	1006.6		190605	1171		169701	1158.2
				193056	1006.64		190476	1171.06		169221	1158.26
				192993	1006.74		190317	1171.14		168996	1158.32
				192960	1006.8		190158	1171.2		168774	1158.38
				193536	1006.86		190158	1171.24		168261	1158.46
				193407	1006.92		190029	1171.34		168069	1158.52
				192738	1006.96		189933	1171.38		167781	1158.6
				192609	1007.06		189612	1171.44		167430	1158.66
				193152	1007.1		189549	1171.5		167142	1158.7
				192993	1007.14		189519	1171.56		166728	1158.76
				192927	1007.24		189423	1171.64		166407	1158.82
				192738	1007.28		189294	1171.7		166089	1158.88
				192417	1007.34		189006	1171.74		165831	1158.96
				192450	1007.38		188877	1171.84		165543	1159.02
				192897	1007.44		188877	1171.88		165258	1159.1
				192768	1007.56		188718	1171.94		165000	1159.16
				192513	1007.6		188622	1172		164682	1159.2
				192513	1007.64		188496	1172.06		164331	1159.26
				192546	1007.74		188430	1172.14		163977	1159.32
				192546	1007.8		188238	1172.2		163785	1159.38
				192129	1007.86		188079	1172.24		163308	1159.46
				192000	1007.92		187920	1172.34		163116	1159.52
				191970	1007.96		187887	1172.38		162828	1159.56
				191937	1008.06		187695	1172.44		162540	1159.62
				191649	1008.1		187569	1172.5		162219	1159.68
				191586	1008.14		187473	1172.56		161805	1159.78
				191490	1008.24		187440	1172.64		161517	1159.82
				191427	1008.3		187281	1172.7		161325	1159.88
				192000	1008.36		187023	1172.74		160815	1159.96
				192000	1008.42		186960	1172.84		160623	1160.02
				191394	1008.46		186834	1172.88		160269	1160.06
				191265	1008.56		186642	1172.94		159981	1160.12
				191811	1008.6		186576	1173		159696	1160.18
				191715	1008.64		186480	1173.06		159279	1160.28
				191553	1008.74		186384	1173.14		158928	1160.32
				191427	1008.8		186258	1173.2		158577	1160.38
				190851	1008.86		186033	1173.24		158289	1160.46
				190788	1008.92		185970	1173.34		158034	1160.52
				191394	1008.96		185841	1173.38		157746	1160.56
				191361	1009.06		185649	1173.44		157392	1160.62
				190884	1009.1		185619	1173.5		157107	1160.68
				190884	1009.14		185490	1173.56		156723	1160.78
				190851	1009.24		185457	1173.64		156435	1160.82
				190851	1009.3		185298	1173.7		156180	1160.88
				190851	1009.36		185043	1173.74		155730	1160.96
				190722	1009.42		184947	1173.84		155508	1161.02
				190275	1009.46		184851	1173.88		155253	1161.06
				190275	1009.56		184692	1173.94		154899	1161.12
				190275	1009.6		184626	1174		154611	1161.18
				190149	1009.64		184434	1174.06		154197	1161.28
				190020	1009.74		184404	1174.14		153876	1161.32
				189924	1009.8		184242	1174.2		153750	1161.38
				190371	1009.86		184020	1174.24		153270	1161.46
				190371	1009.92		183957	1174.34		153078	1161.52
				190053	1009.96		183891	1174.38		152757	1161.56
				189861	1010.06		183669	1174.44		152472	1161.62
				190308	1010.1		183540	1174.5		152184	1161.68
				190212	1010.14		183477	1174.56		151737	1161.78
				190212	1010.24		183381	1174.64		151449	1161.82
				190053	1010.28		183285	1174.7		151353	1161.88
				189414	1010.34		183030	1174.74		150744	1161.96
				189381	1010.38		182997	1174.84		150552	1162.02
				189732	1010.44		182838	1174.88		150330	1162.06
				189477	1010.56		182646	1174.94		149979	1162.12
				189318	1010.6		182550	1175		149691	1162.18
				189702	1010.64		182484	1175.06		149274	1162.28
				189285	1010.74		182421	1175.14		148956	1162.32
				189318	1010.8		182262	1175.2		148764	1162.38
				189444	1010.86		182070	1175.28		148284	1162.46
				189348	1010.92		181974	1175.34		148029	1162.52
				189222	1010.96		181878	1175.38		147741	1162.56
				188679	1011.06		181686	1175.44		147453	1162.62
				188967	1011.1		181590	1175.5		147228	1162.68
				188838	1011.14		181494	1175.56		146748	1162.78
				188709	1011.24		181368	1175.64		146430	1162.82
				188487	1011.28		181239	1175.7		146238	1162.88
				188679	1011.34		181047	1175.74		145821	1162.96
				188709	1011.38		181014	1175.84		145599	1163.02
				188709	1011.44		180855	1175.88		145311	1163.06
				188583	1011.56		180696	1175.94		144960	1163.12
				188709	1011.6		180600	1176		144672	1163.18
				188742	1011.64		180504	1176.06		144288	1163.28
				188679	1011.74		180375	1176.14		143967	1163.32
				188583	1011.78		180312	1176.2		143586	1163.38
				187944	1011.84		180087	1176.24		143298	1163.46
				187848	1011.88		179961	1176.34		143073	1163.52
				188136	1011.94		179865	1176.38		142881	1163.56
				188166	1012.06		179673	1176.44		142563	1163.62
				187623	1012.1		179640	1176.5		142179	1163.68
				187494	1012.14		179418	1176.56		141828	1163.78
				187527	1012.24		179418	1176.64		141570	1163.82
				187494	1012.3		179322	1176.7		141378	1163.88
				188040	1012.36		179034	1176.74		140805	1163.96
				187944	1012.42		178938	1176.84		140613	1164.02
				187305	1012.46		178809	1176.88		140355	1164.06
				187176	1012.56		178650	1176.94		140070	1164.12
				187656	1012.6		178587	1177		139749	1164.18
				187494	1012.64		178554	1177.06		139302	1164.28
				187401	1012.74		178425	1177.14		139047	1164.32
				187272	1012.8		178329	1177.2		138855	1164.38
				186921	1012.86		178011	1177.24		138375	1164.46
				186921	1012.92		177945	1177.34		138183	1164.52
				187401	1012.96		177882	1177.38		137862	1164.56
				187305	1013.06		177723	1177.44		137574	1164.62
				186951	1013.1		177594	1177.5		137256	1164.68
				186984	1013.14		177435	1177.56		136872	1164.78
				187017	1013.24		177402	1177.64		136584	1164.82
				186984	1013.3		177276	1177.7		136200	1164.88
				186696	1013.36		177051	1177.74		135849	1164.96
				186537	1013.42		176925	1177.84		135657	1165.02
				186888	1013.46		176892	1177.88		135369	1165.06
				186825	1013.56		176700	1177.94		135051	1165.12
				186825	1013.6		176637	1178		134763	1165.18
				186408	1013.64		176475	1178.06		134379	1165.28
				185961	1013.74		176445	1178.14		134028	1165.32
				185898	1013.8		176316	1178.2		133899	1165.38
				186408	1013.86		176061	1178.24		133419	1165.46
				186378	1013.92		175965	1178.34		133197	1165.52
				185802	1013.96		175869	1178.38		132876	1165.56
				185739	1014.06		175677	1178.44		132558	1165.62
				185739	1014.1		175614	1178.5		132300	1165.68
				185610	1014.14		175485	1178.56		131919	1165.78
				186186	1014.24		175389	1178.64		131631	1165.82
				186057	1014.3		175260	1178.7		131184	1165.88
				185355	1014.36		175038	1178.78		130704	1166.02
				185289	1014.42		174975	1178.84		130416	1166.06
				185769	1014.46		174879	1178.88		130095	1166.12
				185610	1014.56		174687	1178.94		129777	1166.18
				185514	1014.6		174621	1179		129360	1166.28
				185769	1014.64		174462	1179.06		129072	1166.32
				185196	1014.74		174399	1179.14		128850	1166.38
				185130	1014.8		174303	1179.2		128337	1166.46
				185514	1014.86		174015	1179.24		128145	1166.52
				185385	1014.92		173982	1179.34		127857	1166.56
				185196	1015.06		173919	1179.38		127506	1166.62
				185196	1015.1		173694	1179.44		127314	1166.68
				184554	1015.14		173598	1179.5		126834	1166.78
				184716	1015.24		173472	1179.56		126549	1166.82
				184650	1015.3		173439	1179.64		126099	1166.88
				184587	1015.36		173280	1179.7		125811	1166.96
				184650	1015.42		173025	1179.74		125589	1167.02
				184299	1015.46		172929	1179.84		125364	1167.06
				184203	1015.56		172863	1179.88		125046	1167.12
				184107	1015.6		172704	1179.94		124725	1167.18
				184428	1015.64		172608	1180		124311	1167.28
				184620	1015.74		172482	1180.06		124053	1167.32
				184587	1015.8		172416	1180.14		123702	1167.38
				184011	1015.86		172257	1180.2		123351	1167.46
				183915	1015.92		172032	1180.24		123159	1167.52
				184428	1015.96		171936	1180.34		122871	1167.56
				184332	1016.06		171840	1180.38		122553	1167.62
				184269	1016.1		171681	1180.44		122232	1167.68
				184044	1016.14		171648	1180.5		121881	1167.78
				183501	1016.24		171459	1180.56		121530	1167.82
				183468	1016.3		171363	1180.64		121434	1167.88
				184011	1016.36		171297	1180.7		120954	1167.96
				184011	1016.42		171042	1180.74		120699	1168.02
				183405	1016.46		170946	1180.84		120348	1168.06
				183372	1016.56		170913	1180.88		120090	1168.12
				183438	1016.6		170658	1180.94		119802	1168.18
				183021	1016.64		170595	1181		119421	1168.28
				183597	1016.74		170466	1181.06		119133	1168.32
				183468	1016.8		170403	1181.14		118941	1168.38
				182895	1016.86		170274	1181.2		118461	1168.46
				182799	1016.92		170052	1181.24		118236	1168.52
				183054	1016.96		170019	1181.34		117948	1168.56
				182895	1017.06		169890	1181.38		117663	1168.62
				182799	1017.1		169668	1181.44		117309	1168.68
				183150	1017.14		169635	1181.5		116958	1168.78
				182829	1017.24		169443	1181.56		116640	1168.82
				182829	1017.3		169413	1181.64		116256	1168.88
				182862	1017.36		169284	1181.7		115905	1168.96
				182766	1017.42		169092	1181.74		115776	1169.02
				182895	1017.46		168963	1181.84		115425	1169.06
				182895	1017.56		168870	1181.88		115104	1169.12
				182862	1017.6		168645	1181.94		114849	1169.18
				182253	1017.64		168582	1182		114498	1169.28
				182064	1017.74		168453	1182.06		114114	1169.32
				181998	1017.8		168453	1182.14		113955	1169.38
				182253	1017.86		168324	1182.2		113409	1169.46
				182253	1017.92		168036	1182.28		113154	1169.52
				181680	1017.96		167973	1182.34		112932	1169.56
				181743	1018.06		167877	1182.38		112644	1169.62
				181680	1018.1		167685	1182.44		112386	1169.68
				181710	1018.14		167589	1182.5		111876	1169.78
				182160	1018.24		167430	1182.56		111651	1169.82
				182127	1018.28		167397	1182.64		111429	1169.88
				181359	1018.34		167334	1182.7		110886	1169.96
				181296	1018.38		167016	1182.74		110724	1170.02
				181806	1018.44		166950	1182.84		110406	1170.06
				181680	1018.56		166854	1182.88		110151	1170.12
				181551	1018.6		166662	1182.94		109830	1170.18
				181680	1018.64		166566	1183		109446	1170.28
				181071	1018.74		166503	1183.06		109128	1170.32
				181041	1018.78		166440	1183.14		108936	1170.38
				181551	1018.84		166278	1183.2		108456	1170.46
				181455	1018.88		165993	1183.24		108231	1170.52
				181071	1018.94		165897	1183.34		107943	1170.56
				181071	1019.06		165897	1183.38		107658	1170.62
				181104	1019.1		165705	1183.44		107370	1170.68
				180561	1019.14		165609	1183.5		106986	1170.78
				180879	1019.24		165480	1183.56		106698	1170.82
				180690	1019.28		165417	1183.64		106473	1170.88
				180498	1019.34		165258	1183.7		105996	1170.96
				180432	1019.38		165066	1183.78		105804	1171.02
				180306	1019.44		164937	1183.84		105516	1171.06
				180240	1019.56		164904	1183.88		105228	1171.12
				180114	1019.6		164682	1183.94		104973	1171.18
				180498	1019.64		164586	1184		104589	1171.28
				180528	1019.74		164394	1184.06		104238	1171.32
				180528	1019.78		164331	1184.14		104046	1171.38
				180144	1019.84		164202	1184.2		103629	1171.46
				180081	1019.88		164106	1184.24		103341	1171.52
				180432	1019.94		163977	1184.34		103086	1171.56
				180369	1020.06		163851	1184.38		102798	1171.62
				180240	1020.1		163722	1184.44		102477	1171.68
				179955	1020.14		163563	1184.5		102126	1171.78
				179538	1020.24		163467	1184.56		101838	1171.82
				179409	1020.28		163404	1184.64		101583	1171.88
				179955	1020.34		163242	1184.7		101295	1171.96
				179922	1020.38		163083	1184.74		100977	1172.02
				179283	1020.44		162987	1184.84		100560	1172.06
				179346	1020.56		162828	1184.88		100368	1172.12
				179346	1020.6		162699	1184.94		99984	1172.18
				179091	1020.64		162573	1185		99603	1172.28
				179634	1020.74		162477	1185.06		99282	1172.32
				179538	1020.78		162348	1185.14		98835	1172.38
				178899	1020.84		162189	1185.2		98514	1172.46
				178866	1020.88		162060	1185.24		98292	1172.52
				179154	1020.94		161997	1185.34		98034	1172.56
				178995	1021.06		161835	1185.38		97716	1172.62
				178836	1021.1		161709	1185.44		97428	1172.68
				179217	1021.14		161580	1185.5		97044	1172.78
				178740	1021.24		161454	1185.56		96693	1172.82
				178770	1021.3		161292	1185.64		96276	1172.88
				178962	1021.36		161262	1185.7		95991	1172.96
				178803	1021.42		161004	1185.78		95733	1173.02
				178770	1021.46		160941	1185.84		95478	1173.06
				178770	1021.56		160815	1185.88		95127	1173.12
				178836	1021.6		160653	1185.94		94872	1173.18
				178197	1021.64		160527	1186		94455	1173.28
				178131	1021.74		160431	1186.06		94167	1173.32
				178035	1021.78		160302	1186.14		93753	1173.38
				178197	1021.84		160239	1186.2		93465	1173.46
				178227	1021.88		160014	1186.24		93177	1173.52
				177717	1021.94		159918	1186.34		92952	1173.56
				177717	1022.06		159822	1186.38		92634	1173.62
				177684	1022.1		159759	1186.44		92346	1173.68
				177876	1022.14		159630	1186.5		91929	1173.78
				178197	1022.24		159471	1186.56		91644	1173.82
				178131	1022.28		159312	1186.64		91227	1173.88
				177492	1022.34		159246	1186.7		90972	1173.96
				177366	1022.38		159054	1186.74		90747	1174.02
				177909	1022.44		158928	1186.84		90459	1174.06
				177780	1022.56		158832	1186.88		90171	1174.12
				177717	1022.6		158673	1186.94		89820	1174.18
				177558	1022.64		158577	1187		89469	1174.28
				177045	1022.74		158448	1187.06		89214	1174.32
				176982	1022.78		158319	1187.14		88830	1174.38
				177558	1022.84		158289	1187.2		88479	1174.46
				177492	1022.88		158034	1187.24		88317	1174.52
				176949	1022.94		157968	1187.34		87936	1174.56
				176982	1023.06		157842	1187.38		87678	1174.62
				176982	1023.1		157746	1187.44		87486	1174.68
				176565	1023.14		157617	1187.5		87039	1174.78
				177012	1023.24		157458	1187.56		86751	1174.82
				176886	1023.3		157329	1187.64		86592	1174.88
				176406	1023.36		157266	1187.7		86049	1174.96
				176343	1023.42		157011	1187.74		85890	1175.02
				176439	1023.46		156945	1187.84		85536	1175.06
				176343	1023.56		156819	1187.88		85281	1175.12
				176247	1023.6		156723	1187.94		84963	1175.18
				176631	1023.64		156627	1188		84579	1175.28
				176373	1023.74		156465	1188.06		84324	1175.32
				176373	1023.78		156339	1188.14		83940	1175.38
				176343	1023.84		156276	1188.2		83589	1175.46
				176184	1023.88		155988	1188.24		83331	1175.52
				176439	1023.94		155988	1188.34		83043	1175.56
				176406	1024.06		155859	1188.38		82755	1175.62
				176277	1024.1		155730	1188.44		82437	1175.68
				175767	1024.14		155604	1188.5		82020	1175.78
				175542	1024.24		155442	1188.56		81765	1175.82
				175449	1024.28		155349	1188.64		81318	1175.88
				175830	1024.34		155253	1188.7		81093	1175.96
				175863	1024.38		155028	1188.78		80838	1176.02
				175287	1024.44		154932	1188.84		80550	1176.06
				175224	1024.56		154836	1188.88		80232	1176.12
				175224	1024.6		154707	1188.94		79911	1176.18
				175224	1024.64		154581	1189		79527	1176.28
				175671	1024.74		154452	1189.06		79239	1176.32
				175638	1024.78		154293	1189.14		78825	1176.38
				174903	1024.84		154260	1189.2		78537	1176.46
				174807	1024.88		154005	1189.28		78312	1176.52
				175257	1024.94		153972	1189.34		78057	1176.56
				175191	1025.06		153846	1189.38		77673	1176.62
				175065	1025.1		153750	1189.44		77451	1176.68
				175161	1025.14		153591	1189.5		77034	1176.78
				174552	1025.24		153429	1189.56		76746	1176.82
				174552	1025.28		153333	1189.64		76365	1176.88
				174999	1025.34		153141	1189.7		76077	1176.96
				174936	1025.38		153045	1189.74		75885	1177.02
				174618	1025.44		152949	1189.84		75531	1177.06
				174585	1025.56		152886	1189.88		75276	1177.12
				174618	1025.6		152727	1189.94		74958	1177.18
				174138	1025.64		152598	1190		74607	1177.28
				174330	1025.74		152439	1190.06		74319	1177.32
				174072	1025.78		152310	1190.14		73869	1177.38
				174105	1025.84		152214	1190.2		73551	1177.46
				174105	1025.88		152055	1190.24		73422	1177.52
				173754	1025.94		151959	1190.34		73104	1177.56
				173787	1026.06		151800	1190.38		72879	1177.62
				173721	1026.1		151737	1190.44		72495	1177.68
				173721	1026.14		151575	1190.5		72144	1177.78
				174138	1026.24		151416	1190.56		71889	1177.82
				174042	1026.28		151353	1190.64		71472	1177.88
				173403	1026.34		151287	1190.7		71121	1177.96
				173403	1026.38		151065	1190.74		70899	1178.02
				173529	1026.44		150936	1190.84		70674	1178.06
				173370	1026.56		150840	1190.88		70419	1178.12
				173274	1026.6		150714	1190.94		70098	1178.18
				173370	1026.64		150585	1191		69747	1178.28
				173562	1026.74		150456	1191.06		69459	1178.32
				173466	1026.78		150297	1191.14		69237	1178.38
				173082	1026.84		150234	1191.2		68916	1178.46
				173082	1026.88		150009	1191.24		68691	1178.52
				173052	1026.94		149979	1191.34		68118	1178.56
				173052	1027.06		149883	1191.38		67893	1178.62
				172986	1027.1		149754	1191.44		67572	1178.68
				172890	1027.14		149595	1191.5		67125	1178.78
				172827	1027.24		149370	1191.56		66903	1178.82
				172827	1027.28		149370	1191.64		66678	1178.88
				172698	1027.34		149241	1191.7		66360	1178.96
				172602	1027.38		149082	1191.78		66072	1179.02
				172635	1027.44		148956	1191.84		65496	1179.06
				172539	1027.56		148890	1191.88		65367	1179.12
				172413	1027.6		148731	1191.94		65049	1179.18
				172380	1027.64		148602	1192		64569	1179.28
				172347	1027.74		148410	1192.06		64314	1179.32
				172251	1027.78		148314	1192.14		64056	1179.38
				172188	1027.84		148284	1192.2		63771	1179.46
				172188	1027.88		147996	1192.28		63450	1179.52
				172092	1027.94		147933	1192.34		62970	1179.56
				172059	1028.06		147804	1192.38		62778	1179.62
				171963	1028.1		147708	1192.44		62490	1179.68
				171837	1028.14		147579	1192.5		62076	1179.78
				171837	1028.24		147453	1192.56		61755	1179.82
				171771	1028.28		147324	1192.64		61563	1179.88
				171645	1028.34		147261	1192.7		61245	1179.96
				171678	1028.38		147006	1192.78		60990	1180.02
				171582	1028.44		146940	1192.84		60444	1180.06
				171516	1028.56		146844	1192.88		60255	1180.12
				171453	1028.6		146718	1192.94		59934	1180.18
				171390	1028.64		146652	1193		59550	1180.28
				171324	1028.74		146397	1193.06		59262	1180.32
				171294	1028.8		146271	1193.14		59070	1180.38
				171228	1028.86		146175	1193.2		58686	1180.46
				171132	1028.92		146013	1193.28		58431	1180.52
				171069	1028.96		145983	1193.34		57951	1180.56
				171036	1029.06		145854	1193.38		57792	1180.62
				170973	1029.1		145758	1193.44		57441	1180.68
				170877	1029.16		145566	1193.5		57090	1180.78
				170781	1029.22		145470	1193.56		56832	1180.82
				170781	1029.28		145311	1193.64		56577	1180.88
				170685	1029.36		145215	1193.7		56289	1180.96
				170655	1029.42		145023	1193.78		56034	1181.02
				170589	1029.46		145023	1193.84		55524	1181.06
				170526	1029.56		144864	1193.88		55299	1181.12
				170463	1029.6		144735	1193.94		55011	1181.18
				170367	1029.66		144576	1194		54597	1181.28
				170367	1029.72		144447	1194.06		54372	1181.32
				170271	1029.78		144321	1194.14		54180	1181.38
				170175	1029.84		144159	1194.2		53892	1181.46
				170175	1029.88		144033	1194.28		53541	1181.52
				170079	1029.94		143937	1194.34		53061	1181.56
				170079	1030.06		143841	1194.38		52902	1181.62
				170016	1030.1		143745	1194.44		52581	1181.68
				169854	1030.14		143586	1194.5		52167	1181.78
				169824	1030.24		143424	1194.56		51816	1181.82
				169824	1030.28		143328	1194.64		51687	1181.88
				169662	1030.34		143169	1194.7		51399	1181.96
				169632	1030.38		143040	1194.78		51048	1182.02
				169599	1030.44		142944	1194.84		50535	1182.06
				169566	1030.56		142818	1194.88		50313	1182.12
				169440	1030.6		142689	1194.94		50058	1182.18
				169377	1030.64		142659	1195		49641	1182.28
				169311	1030.74		142434	1195.06		49353	1182.32
				169248	1030.8		142305	1195.14		49161	1182.38
				169185	1030.86		142146	1195.2		48810	1182.46
				169185	1030.92		141987	1195.28		48555	1182.52
				169119	1030.96		141924	1195.34		48042	1182.56
				169056	1031.06		141795	1195.38		47850	1182.62
				168897	1031.1		141699	1195.44		47595	1182.68
				168897	1031.14		141603	1195.5		47115	1182.78
				168801	1031.24		141411	1195.56		46860	1182.82
				168735	1031.28		141282	1195.64		46638	1182.88
				168672	1031.34		141156	1195.7		46317	1182.96
				168609	1031.38		141027	1195.78		46029	1183.02
				168546	1031.44		140964	1195.84		45486	1183.06
				168513	1031.56		140835	1195.88		45327	1183.12
				168450	1031.6		140709	1195.94		45069	1183.18
				168384	1031.64		140580	1196		44655	1183.28
				168321	1031.74		140421	1196.06		44334	1183.32
				168288	1031.78		140325	1196.14		44112	1183.38
				168192	1031.84		140196	1196.2		43791	1183.46
				168129	1031.88		140004	1196.28		43536	1183.52
				168096	1031.94		140004	1196.34		43089	1183.56
				168033	1032.06		139878	1196.38		42897	1183.62
				167937	1032.1		139686	1196.44		42609	1183.68
				167874	1032.14		139620	1196.5		42162	1183.78
				167811	1032.24		139428	1196.56		41841	1183.82
				167778	1032.28		139302	1196.64		41649	1183.88
				167682	1032.34		139143	1196.7		41331	1183.96
				167619	1032.38		138981	1196.78		41076	1184.02
				167586	1032.44		138951	1196.84		40596	1184.06
				167490	1032.56		138855	1196.88		40404	1184.12
				167457	1032.6		138726	1196.94		40149	1184.18
				167361	1032.64		138597	1197		39732	1184.28
				167361	1032.74		138438	1197.06		39444	1184.32
				167298	1032.78		138312	1197.14		39252	1184.38
				167235	1032.84		138150	1197.2		38997	1184.46
				167172	1032.88		138024	1197.24		38709	1184.52
				167076	1032.94		137928	1197.34		38166	1184.56
				167043	1033.06		137832	1197.38		38037	1184.62
				166947	1033.1		137670	1197.44		37815	1184.68
				166884	1033.14		137607	1197.5		37398	1184.78
				166884	1033.24		137448	1197.56		37047	1184.82
				166722	1033.28		137319	1197.64		36855	1184.88
				166755	1033.34		137127	1197.7		36537	1184.96
				166692	1033.38		137064	1197.78		36216	1185.02
				166626	1033.44		136968	1197.84		35736	1185.06
				166596	1033.56		136809	1197.88		35481	1185.12
				166530	1033.6		136743	1197.94		35193	1185.18
				166404	1033.64		136584	1198		34809	1185.28
				166308	1033.74		136425	1198.06		34521	1185.32
				166275	1033.78		136296	1198.14		34299	1185.38
				166212	1033.84		136233	1198.2		34011	1185.46
				166083	1033.88		136008	1198.34		33660	1185.52
				166083	1033.94		135882	1198.38		33180	1185.56
				165987	1034.06		135720	1198.44		32988	1185.62
				165924	1034.1		135594	1198.5		32733	1185.68
				165828	1034.14		135435	1198.56		32286	1185.78
				165828	1034.24		135306	1198.64		31932	1185.82
				165795	1034.28		135243	1198.7		31710	1185.88
				165669	1034.34		135018	1198.74		31485	1185.96
				165606	1034.38		134955	1198.84		31134	1186.02
				165636	1034.44		134859	1198.88		30654	1186.06
				165573	1034.56		134763	1198.94		30399	1186.12
				165510	1034.6		134604	1199		30144	1186.18
				165348	1034.64		134442	1199.06		29697	1186.28
				165285	1034.74		134379	1199.14		29409	1186.32
				165222	1034.78		134187	1199.2		29217	1186.38
				165156	1034.84		133962	1199.28		28929	1186.46
				165156	1034.88		133962	1199.34		28641	1186.52
				165126	1034.94		133836	1199.38		28098	1186.56
				165060	1035.06		133677	1199.44		27873	1186.62
				164964	1035.1		133581	1199.5		27555	1186.68
				164871	1035.14		133485	1199.56		27201	1186.78
				164805	1035.24		133293	1199.64		26916	1186.82
				164742	1035.3		133164	1199.7		26691	1186.88
				164709	1035.36		133035	1199.78		26370	1186.96
				164679	1035.42		132972	1199.84		26148	1187.02
				164583	1035.46		132846	1199.88		25668	1187.06
				164583	1035.56		132813	1199.94		25380	1187.12
				164517	1035.6		132558	1200		25125	1187.18
				164391	1035.64		132462	1200.06		24741	1187.28
				164358	1035.74		132300	1200.14		24420	1187.32
				164295	1035.8		132108	1200.2		24294	1187.38
				164166	1035.86		132015	1200.28		23877	1187.46
				164166	1035.92		131949	1200.34		23622	1187.52
				164103	1035.96		131853	1200.38		23112	1187.56
				164070	1036.06		131727	1200.44		22950	1187.62
				163974	1036.1		131598	1200.5		22662	1187.68
				163848	1036.14		131439	1200.56		22311	1187.78
				163815	1036.24		131343	1200.64		21993	1187.82
				163752	1036.28		131151	1200.7		21735	1187.88
				163686	1036.34		131055	1200.78		21546	1187.96
				163623	1036.38		130959	1200.84		21258	1188.02
				163590	1036.44		130800	1200.88		20715	1188.06
				163527	1036.56		130704	1200.94		20553	1188.12
				163494	1036.6		130542	1201		20265	1188.18
				163368	1036.64		130479	1201.06		19851	1188.28
				163368	1036.74		130350	1201.14		19500	1188.32
				163272	1036.8		130191	1201.2		19338	1188.38
				163239	1036.86		130032	1201.28		19116	1188.46
				163113	1036.92		129969	1201.34		18795	1188.52
				163047	1036.96		129777	1201.38		18285	1188.56
				163047	1037.06		129711	1201.44		18093	1188.62
				162951	1037.1		129585	1201.5		17838	1188.68
				162888	1037.14		129456	1201.56		17421	1188.78
				162792	1037.24		129297	1201.64		17070	1188.82
				162759	1037.3		129201	1201.7		16941	1188.88
				162696	1037.36		129042	1201.74		16623	1188.96
				162600	1037.42		128946	1201.84		16302	1189.02
				162570	1037.46		128784	1201.88		15855	1189.06
				162537	1037.56		128721	1201.94		15663	1189.12
				162504	1037.6		128592	1202		15408	1189.18
				162378	1037.64		128466	1202.06		15087	1189.28
				162312	1037.74		128337	1202.14		14736	1189.32
				162312	1037.8		128145	1202.2		14544	1189.38
				162153	1037.86		128019	1202.28		14226	1189.46
				162120	1037.92		127986	1202.34		13968	1189.52
				162090	1037.96		127857	1202.38		13521	1189.56
				162024	1038.06		127698	1202.44		13266	1189.62
				161961	1038.1		127572	1202.5		13011	1189.68
				161865	1038.14		127380	1202.56		12660	1189.78
				161835	1038.24		127314	1202.64		12339	1189.82
				161739	1038.3		127188	1202.7		12147	1189.88
				161673	1038.36		127059	1202.78		11859	1189.96
				161610	1038.42		126930	1202.84		11604	1190.02
				161547	1038.46		126867	1202.88		11157	1190.06
				161514	1038.56		126738	1202.94		10995	1190.12
				161481	1038.6		126612	1203		10644	1190.18
				161385	1038.64		126420	1203.06		10260	1190.28
				161289	1038.74		126324	1203.14		10068	1190.32
				161259	1038.8		126165	1203.2		9813	1190.38
				161193	1038.86		126036	1203.28		9558	1190.46
				161130	1038.92		125940	1203.34		9303	1190.52
				161100	1038.96		125811	1203.38		9333	1190.56
				161004	1039.06		125718	1203.44		9078	1190.62
				161004	1039.1		125589	1203.5		8727	1190.68
				160938	1039.14		125397	1203.56		8310	1190.78
				160842	1039.24		125268	1203.64		8184	1190.82
				160842	1039.3		125109	1203.7		7896	1190.88
				160746	1039.36		125046	1203.78		7641	1190.96
				160650	1039.42		124950	1203.84		7287	1191.02
				160554	1039.46		124791	1203.88		6744	1191.06
				160554	1039.56		124725	1203.94		6522	1191.12
				160458	1039.6		124599	1204		6234	1191.18
				160395	1039.64		124437	1204.06		5913	1191.28
				160332	1039.74		124311	1204.14		5658	1191.32
				160236	1039.8		124149	1204.2		5529	1191.38
				160203	1039.86		124023	1204.28		5625	1191.46
				160107	1039.92		123927	1204.34		5466	1191.52
				160107	1039.96		123831	1204.38		5850	1191.56
				160077	1040.06		123735	1204.44		5499	1191.62
				159981	1040.1		123543	1204.5		5274	1191.68
				159885	1040.14		123414	1204.56		5274	1191.68
				159819	1040.24		123288	1204.64		5244	1191.72
				159789	1040.3		123159	1204.7		4635	1191.88
				159723	1040.36		123033	1204.78		4347	1191.96
				159693	1040.42		122937	1204.84		4059	1192.02
				159630	1040.46		122808	1204.88		3516	1192.06
				159534	1040.56		122712	1204.94		3390	1192.12
				159501	1040.6		122583	1205		3036	1192.18
				159372	1040.64		122391	1205.06		2718	1192.28
				159372	1040.74		122328	1205.14		2526	1192.32
				159309	1040.8		122169	1205.2		2844	1192.38
				159180	1040.86		122040	1205.28		2622	1192.46
				159150	1040.92		121944	1205.34		2367	1192.52
				159054	1040.96		121818	1205.38		2175	1192.56
				158988	1041.06		121722	1205.44		1917	1192.62
				158958	1041.1		121626	1205.5		1728	1192.68
				158862	1041.14		121434	1205.56		1470	1192.78
				158829	1041.24		121305	1205.64		1278	1192.82
				158799	1041.3		121146	1205.7		1119	1192.88
				158733	1041.36		121017	1205.78		1056	1192.96
				158637	1041.42		120954	1205.84		1023	1193.02
				158541	1041.46		120858	1205.88		864	1193.06
				158511	1041.56		120762	1205.94		831	1193.12
				158478	1041.6		120633	1206		768	1193.18
				158382	1041.64		120441	1206.06		801	1193.28
				158349	1041.74		120282	1206.14		897	1193.32
				158253	1041.8		120219	1206.2		768	1193.38
				158223	1041.86		120060	1206.28		705	1193.46
				158127	1041.92		119994	1206.34		639	1193.52
				158094	1041.96		119802	1206.38		543	1193.56
				158094	1042.06		119739	1206.44		543	1193.62
				158031	1042.1		119580	1206.5		513	1193.68
				157839	1042.14		119451	1206.56		513	1193.78
				157872	1042.24		119292	1206.64		543	1193.82
				157743	1042.3		119163	1206.7		543	1193.88
				157647	1042.36		119067	1206.78		480	1193.96
				157647	1042.42		118908	1206.84		447	1194.02
				157614	1042.46		118812	1206.88		447	1194.06
				157551	1042.56		118716	1206.94		351	1194.12
				157455	1042.6		118620	1207		351	1194.18
				157392	1042.64		118428	1207.06		351	1194.28
				157329	1042.74		118332	1207.14		417	1194.32
				157296	1042.8		118173	1207.2		417	1194.38
				157167	1042.86		118014	1207.28		384	1194.46
				157137	1042.92		117885	1207.34		417	1194.52
				157071	1042.96		117822	1207.38		609	1194.56
				157008	1043.06		117663	1207.44		639	1194.62
				156945	1043.1		117597	1207.5		639	1194.68
				156879	1043.14		117405	1207.56		639	1194.78
				156816	1043.24		117309	1207.64		513	1194.82
				156720	1043.3		117183	1207.7		447	1194.88
				156687	1043.36		117054	1207.78		417	1194.96
				156657	1043.42		116958	1207.84		384	1195.02
				156561	1043.46		116862	1207.88		384	1195.06
				156528	1043.56		116670	1207.94		480	1195.12
				156465	1043.6		116640	1208		480	1195.18
				156402	1043.64		116448	1208.06		480	1195.28
				156306	1043.74		116319	1208.14		447	1195.32
				156273	1043.8		116127	1208.2		384	1195.38
				156177	1043.86		116031	1208.28		351	1195.46
				156144	1043.92		115905	1208.34		225	1195.52
				156081	1044		115839	1208.38		225	1195.56
				156018	1044.06		115713	1208.42		192	1195.62
				155922	1044.1		115551	1208.52		159	1195.68
				155889	1044.14		115455	1208.58		159	1195.78
				155793	1044.24		115329	1208.64		192	1195.82
				155697	1044.3		115137	1208.7		192	1195.88
				155730	1044.36		114978	1208.74		225	1195.96
				155601	1044.42		114912	1208.84		192	1196.02
				155571	1044.46		114849	1208.88
				155505	1044.56		114720	1208.94
				155409	1044.6		114498	1209
				155379	1044.64		114465	1209.1
				155346	1044.74		114273	1209.14
				155283	1044.8		114114	1209.2
				155217	1044.86		114018	1209.28
				155187	1044.92		113955	1209.34
				155058	1044.96		113793	1209.38
				154962	1045.06		113763	1209.44
				154932	1045.1		113505	1209.5
				154866	1045.14		113475	1209.6
				154803	1045.24		113313	1209.64
				154770	1045.3		113124	1209.7
				154707	1045.36		112995	1209.78
				154644	1045.42		112995	1209.84
				154578	1045.46		112803	1209.88
				154578	1045.56		112740	1209.94
				154452	1045.6		112515	1210
				154419	1045.64		112452	1210.1
				154356	1045.74		112293	1210.14
				154260	1045.8		112164	1210.2
				154260	1045.86		112101	1210.28
				154164	1045.92		112005	1210.34
				154101	1045.96		111843	1210.38
				154068	1046.06		111684	1210.44
				153972	1046.1		111492	1210.5
				153939	1046.14		111492	1210.6
				153843	1046.24		111333	1210.64
				153717	1046.36		111174	1210.7
				153654	1046.42		111045	1210.78
				153588	1046.46		110982	1210.84
				153525	1046.56		110820	1210.88
				153525	1046.6		110661	1210.94
				153366	1046.64		110502	1211
				153333	1046.74		110406	1211.1
				153270	1046.8		110310	1211.14
				153204	1046.86		110151	1211.2
				153141	1046.92		110055	1211.28
				153078	1046.96		109959	1211.34
				153012	1047.06		109830	1211.38
				152919	1047.1		109701	1211.44
				152853	1047.14		109479	1211.5
				152853	1047.24		109383	1211.6
				152694	1047.3		109320	1211.64
				152694	1047.36		109191	1211.7
				152631	1047.42		108999	1211.78
				152565	1047.46		108936	1211.84
				152535	1047.56		108807	1211.88
				152469	1047.6		108711	1211.94
				152343	1047.64		108519	1212
				152373	1047.74		108456	1212.1
				152277	1047.8		108297	1212.14
				152181	1047.86		108135	1212.2
				152151	1047.92		108072	1212.28
				152088	1047.96		107943	1212.34
				152022	1048.06		107850	1212.38
				151959	1048.1		107688	1212.44
				151863	1048.14		107562	1212.5
				151800	1048.24		107433	1212.6
				151767	1048.3		107337	1212.64
				151734	1048.36		107178	1212.7
				151608	1048.42		107082	1212.78
				151608	1048.46		106953	1212.84
				151479	1048.56		106890	1212.88
				151446	1048.6		106698	1212.94
				151383	1048.64		106539	1213
				151383	1048.74		106473	1213.1
				151257	1048.8		106347	1213.14
				151224	1048.86		106122	1213.2
				151128	1048.92		106059	1213.28
				151095	1048.96		105996	1213.34
				150969	1049.06		105867	1213.38
				150999	1049.1		105738	1213.44
				150873	1049.14		105483	1213.5
				150807	1049.24		105450	1213.6
				150777	1049.3		105387	1213.64
				150681	1049.36		105195	1213.7
				150618	1049.42		105036	1213.78
				150585	1049.46		104940	1213.84
				150552	1049.56		104844	1213.88
				150426	1049.6		104685	1213.94
				150330	1049.64		104523	1214
				150297	1049.74		104460	1214.1
				150264	1049.8		104301	1214.14
				150168	1049.86		104142	1214.2
				150105	1049.92		104046	1214.28
				150105	1049.96		103950	1214.34
				150042	1050.06		103821	1214.38
				150009	1050.1		103692	1214.44
				149850	1050.14		103500	1214.5
				149850	1050.24		103437	1214.6
				149787	1050.3		103341	1214.64
				149691	1050.36		103149	1214.7
				149562	1050.42		103023	1214.78
				149562	1050.46		102990	1214.84
				149562	1050.56		102798	1214.88
				149499	1050.6		102735	1214.94
				149370	1050.64		102510	1215
				149337	1050.74		102414	1215.1
				149274	1050.8		102222	1215.14
				149241	1050.86		102126	1215.2
				149115	1050.92		102030	1215.28
				149082	1051		101967	1215.34
				149019	1051.06		101808	1215.38
				148986	1051.1		101742	1215.44
				148860	1051.14		101487	1215.5
				148860	1051.24		101424	1215.6
				148731	1051.3		101361	1215.64
				148635	1051.36		101169	1215.7
				148635	1051.42		101040	1215.78
				148602	1051.46		100944	1215.84
				148539	1051.56		100815	1215.88
				148539	1051.6		100719	1215.94
				148413	1051.64		100530	1216
				148347	1051.74		100464	1216.1
				148221	1051.8		100338	1216.14
				148221	1051.86		100146	1216.2
				148251	1051.92		100017	1216.28
				148029	1052		99954	1216.34
				147996	1052.06		99858	1216.38
				147963	1052.1		99699	1216.44
				147867	1052.14		99507	1216.5
				147837	1052.24		99441	1216.6
				147741	1052.3		99282	1216.64
				147741	1052.36		99153	1216.7
				147708	1052.42		99027	1216.78
				147516	1052.5		98931	1216.84
				147486	1052.56		98835	1216.88
				147453	1052.6		98676	1216.94
				147390	1052.64		98547	1217
				147294	1052.74		98418	1217.1
				147261	1052.8		98322	1217.14
				147294	1052.86		98163	1217.2
				147198	1052.92		98034	1217.28
				147006	1052.96		97971	1217.34
				147036	1053.06		97875	1217.38
				146940	1053.1		97749	1217.44
				146814	1053.14		97524	1217.5
				146847	1053.24		97428	1217.6
				146781	1053.3		97332	1217.64
				146751	1053.36		97173	1217.7
				146685	1053.42		97014	1217.78
				146526	1053.46		97014	1217.84
				146526	1053.56		96822	1217.88
				146463	1053.6		96726	1217.94
				146367	1053.64		96564	1218
				146301	1053.74		96438	1218.1
				146334	1053.8		96342	1218.14
				146175	1053.86		96150	1218.2
				146079	1053.92		96021	1218.28
				146112	1053.96		95958	1218.34
				146079	1054.06		95829	1218.38
				145983	1054.1		95766	1218.44
				145920	1054.14		95541	1218.5
				145824	1054.24		95415	1218.6
				145758	1054.3		95286	1218.64
				145695	1054.36		95160	1218.7
				145695	1054.42		95031	1218.78
				145536	1054.46		94935	1218.84
				145536	1054.56		94872	1218.88
				145440	1054.6		94710	1218.94
				145407	1054.64		94551	1219
				145377	1054.74		94455	1219.1
				145311	1054.8		94359	1219.14
				145248	1054.86		94167	1219.2
				145185	1054.92		94008	1219.28
				145056	1054.96		93945	1219.34
				145023	1055.06		93849	1219.38
				144960	1055.1		93753	1219.44
				144864	1055.14		93495	1219.5
				144831	1055.24		93432	1219.6
				144768	1055.3		93306	1219.64
				144735	1055.36		93177	1219.7
				144672	1055.42		93018	1219.78
				144513	1055.46		92952	1219.84
				144480	1055.56		92856	1219.88
				144480	1055.6		92730	1219.94
				144354	1055.64		92538	1220
				144354	1055.74		92505	1220.1
				144288	1055.8		92346	1220.14
				144225	1055.86		92121	1220.2
				144192	1055.92		91995	1220.28
				144066	1055.96		91962	1220.34
				144000	1056.06		91866	1220.38
				143937	1056.1		91707	1220.44
				143907	1056.14		91548	1220.5
				143811	1056.24		91482	1220.6
				143745	1056.3		91356	1220.64
				143715	1056.36		91164	1220.7
				143682	1056.42		91068	1220.78
				143523	1056.46		91002	1220.84
				143523	1056.56		90843	1220.88
				143427	1056.6		90684	1220.94
				143394	1056.64		90525	1221
				143298	1056.74		90459	1221.1
				143235	1056.8		90300	1221.14
				143235	1056.86		90171	1221.2
				143139	1056.92		90045	1221.28
				143043	1056.96		89979	1221.34
				142980	1057.06		89853	1221.38
				142980	1057.1		89694	1221.44
				142851	1057.14		89502	1221.5
				142851	1057.24		89469	1221.6
				142755	1057.3		89277	1221.64
				142755	1057.36		89118	1221.7
				142659	1057.42		88989	1221.78
				142530	1057.46		88959	1221.84
				142500	1057.56		88797	1221.88
				142500	1057.6		88701	1221.94
				142371	1057.64		88542	1222
				142341	1057.74		88446	1222.1
				142308	1057.8		88317	1222.14
				142245	1057.86		88287	1222.2
				142212	1057.92		88125	1222.28
				142053	1057.96		87870	1222.34
				141987	1058.06		87807	1222.38
				141987	1058.1		87678	1222.44
				141861	1058.14		87519	1222.5
				141828	1058.24		87390	1222.6
				141828	1058.3		87294	1222.64
				141732	1058.36		87231	1222.7
				141699	1058.42		87105	1222.78
				141444	1058.46		86847	1222.84
				141381	1058.56		86751	1222.88
				141477	1058.6		86751	1222.94
				141477	1058.64		86496	1223
				141348	1058.74		86463	1223.1
				141252	1058.8		86337	1223.14
				141252	1058.86		86208	1223.2
				141126	1058.92		86112	1223.28
				141030	1058.96		85890	1223.34
				140997	1059.06		85761	1223.38
				140934	1059.1		85698	1223.44
				140871	1059.14		85506	1223.5
				140871	1059.24		85440	1223.6
				140805	1059.3		85314	1223.64
				140775	1059.36		85122	1223.7
				140709	1059.42		85059	1223.74
				140583	1059.46		84963	1223.8
				140517	1059.56		84834	1223.92
				140454	1059.6		84738	1223.96
				140421	1059.64		84513	1224
				140391	1059.74		84450	1224.1
				140199	1059.8		84291	1224.14
				140103	1059.86		84258	1224.2
				140007	1059.92		84099	1224.24
				140229	1059.96		83907	1224.3
				140166	1060.06		83811	1224.42
				140070	1060.1		83715	1224.46
				139815	1060.14		83523	1224.5
				139848	1060.24		83427	1224.6
				139752	1060.3		83235	1224.64
				139782	1060.36		83235	1224.7
				139686	1060.42		83076	1224.74
				139431	1060.46		82947	1224.8
				139431	1060.56		82821	1224.92
				139401	1060.6		82725	1224.96
				139431	1060.64		82533	1225
				139401	1060.74		82437	1225.1
				139335	1060.8		82341	1225.14
				139239	1060.86		82245	1225.2
				139176	1060.92		82116	1225.24
				138951	1060.96		81894	1225.3
				138951	1061.06		81798	1225.42
				138984	1061.1		81735	1225.46
				138951	1061.14		81543	1225.5
				138888	1061.24		81447	1225.6
				138855	1061.3		81285	1225.64
				138696	1061.36		81126	1225.7
				138537	1061.42		81063	1225.74
				138474	1061.5		80997	1225.8
				138504	1061.56		80808	1225.92
				138504	1061.6		80679	1225.96
				138378	1061.64		80520	1226
				138312	1061.74		80520	1226.1
				138312	1061.8		80358	1226.14
				138378	1061.86		80262	1226.2
				138282	1061.92		80103	1226.24
				138024	1061.96		79881	1226.3
				137961	1062.06		79785	1226.42
				137928	1062.1		79752	1226.46
				137865	1062.14		79527	1226.5
				137835	1062.24		79401	1226.6
				137769	1062.3		79272	1226.64
				137739	1062.36		79239	1226.7
				137643	1062.42		79143	1226.74
				137577	1062.46		78921	1226.8
				137514	1062.56		78792	1226.92
				137451	1062.6		78792	1226.96
				137418	1062.64		78537	1227
				137322	1062.74		78441	1227.1
				137289	1062.8		78312	1227.14
				137193	1062.86		78249	1227.2
				137163	1062.92		78186	1227.24
				137067	1062.96		77931	1227.3
				137067	1063.06		77802	1227.42
				137067	1063.1		77673	1227.46
				136842	1063.14		77514	1227.5
				136746	1063.24		77451	1227.6
				136716	1063.3		77355	1227.64
				136683	1063.36		77226	1227.7
				136620	1063.42		77100	1227.74
				136587	1063.46		76875	1227.8
				136554	1063.56		76842	1227.92
				136524	1063.6		76779	1227.96
				136428	1063.64		76524	1228
				136332	1063.74		76458	1228.1
				136269	1063.8		76269	1228.14
				136203	1063.86		76236	1228.2
				136203	1063.92		76140	1228.24
				135948	1063.96		75885	1228.3
				135948	1064.06		75756	1228.42
				135981	1064.1		75660	1228.46
				135915	1064.14		75531	1228.5
				135915	1064.24		75468	1228.6
				135852	1064.3		75342	1228.64
				135756	1064.36		75276	1228.7
				135693	1064.42		75117	1228.74
				135597	1064.46		74862	1228.8
				135501	1064.56		74796	1228.92
				135501	1064.6		74733	1228.96
				135405	1064.64		74511	1229
				135342	1064.74		74415	1229.1
				135276	1064.8		74319	1229.14
				135246	1064.86		74253	1229.2
				135150	1064.92		74094	1229.24
				135084	1065		73839	1229.3
				135021	1065.06		73773	1229.42
				134988	1065.1		73773	1229.46
				134895	1065.14		73518	1229.5
				134862	1065.24		73296	1229.64
				134766	1065.3		73230	1229.7
				134733	1065.36		73104	1229.74
				134670	1065.42		72879	1229.8
				134511	1065.46		72783	1229.92
				134511	1065.56		72720	1229.96
				134478	1065.6		72528	1230
				134319	1065.64		72432	1230.1
				134382	1065.74		72303	1230.14
				134286	1065.8		72273	1230.2
				134223	1065.86		72111	1230.24
				134157	1065.92		71889	1230.3
				134064	1065.96		71826	1230.42
				134031	1066.06		71730	1230.46
				133902	1066.1		71505	1230.5
				133872	1066.14		71409	1230.6
				133839	1066.24		71346	1230.64
				133743	1066.3		71250	1230.7
				133743	1066.36		71121	1230.74
				133584	1066.42		70866	1230.8
				133551	1066.46		70833	1230.92
				133518	1066.56		70737	1230.96
				133488	1066.6		70482	1231
				133329	1066.64		70419	1231.1
				133296	1066.74		70290	1231.14
				133263	1066.8		70227	1231.2
				133233	1066.86		70098	1231.24
				133167	1066.92		69906	1231.3
				133041	1066.96		69810	1231.42
				133041	1067.06		69747	1231.46
				132912	1067.1		69492	1231.5
				132816	1067.14		69426	1231.6
				132816	1067.24		69300	1231.64
				132783	1067.3		69237	1231.7
				132783	1067.36		69171	1231.74
				132720	1067.42		68883	1231.8
				132432	1067.46		68787	1231.92
				132402	1067.56		68691	1231.96
				132402	1067.6		68499	1232
				132369	1067.64		68436	1232.1
				132336	1067.74		68340	1232.14
				132336	1067.8		68244	1232.2
				132273	1067.86		68148	1232.24
				132210	1067.92		67926	1232.3
				132081	1067.96		67830	1232.42
				132081	1068.06		67764	1232.46
				131985	1068.1		67542	1232.5
				131889	1068.14		67476	1232.6
				131826	1068.24		67317	1232.64
				131793	1068.3		67254	1232.7
				131763	1068.36		67125	1232.74
				131667	1068.42		66837	1232.8
				131571	1068.5		66774	1232.92
				131538	1068.56		66711	1232.96
				131505	1068.6		66519	1233
				131409	1068.64		66390	1233.1
				131346	1068.74		66294	1233.14
				131283	1068.8		66264	1233.2
				131250	1068.86		66102	1233.24
				131187	1068.92		65910	1233.36
				131028	1068.96		65814	1233.42
				130995	1069.06		65751	1233.46
				130962	1069.1		65496	1233.5
				130899	1069.14		65400	1233.6
				130836	1069.24		65337	1233.64
				130803	1069.3		65241	1233.7
				130740	1069.36		65112	1233.74
				130674	1069.42		64887	1233.8
				130578	1069.46		64791	1233.92
				130482	1069.56		64728	1233.96
				130482	1069.6		64536	1234
				130389	1069.64		64473	1234.1
				130356	1069.74		64377	1234.14
				130323	1069.8		64248	1234.2
				130227	1069.86		64122	1234.24
				130197	1069.92		63930	1234.3
				130035	1069.96		63834	1234.42
				129972	1070.06		63738	1234.46
				130005	1070.1		63546	1234.5
				129909	1070.14		63483	1234.6
				129813	1070.24		63354	1234.64
				129780	1070.3		63291	1234.7
				129747	1070.36		63129	1234.74
				129717	1070.42		62940	1234.8
				129588	1070.46		62811	1234.92
				129492	1070.56		62715	1234.96
				129462	1070.6		62490	1235
				129396	1070.64		62427	1235.1
				129366	1070.74		62298	1235.14
				129333	1070.8		62298	1235.2
				129204	1070.86		62139	1235.24
				129174	1070.92		61884	1235.3
				129078	1070.96		61755	1235.42
				129078	1071.06		61755	1235.46
				128982	1071.1		61500	1235.5
				128916	1071.14		61437	1235.6
				128823	1071.24		61308	1235.64
				128790	1071.3		61245	1235.7
				128727	1071.36		61116	1235.74
				128661	1071.42		60894	1235.8
				128535	1071.46		60798	1235.92
				128502	1071.56		60702	1235.96
				128469	1071.6		60510	1236
				128373	1071.64		60414	1236.1
				128310	1071.74		60318	1236.14
				128310	1071.8		60189	1236.2
				128214	1071.86		60126	1236.24
				128181	1071.92		59838	1236.3
				128055	1072		59805	1236.42
				128022	1072.06		59709	1236.46
				128022	1072.1		59517	1236.5
				127863	1072.14		59421	1236.6
				127830	1072.24		59358	1236.66
				127734	1072.3		59232	1236.72
				127734	1072.36		59136	1236.78
				127671	1072.42		58974	1236.86
				127542	1072.46		58848	1236.92
				127512	1072.56		58782	1236.96
				127446	1072.6		58590	1237
				127353	1072.64		58464	1237.1
				127353	1072.74		58335	1237.14
				127287	1072.8		58239	1237.2
				127224	1072.86		58113	1237.24
				127191	1072.92		57825	1237.3
				127065	1072.96		57792	1237.42
				126999	1073.06		57696	1237.46
				126969	1073.1		57537	1237.5
				126873	1073.14		57441	1237.6
				126807	1073.24		57378	1237.64
				126744	1073.3		57282	1237.7
				126711	1073.36		57312	1237.74
				126618	1073.42		57825	1237.8
				126522	1073.46		57729	1237.92
				126489	1073.56		57441	1237.96
				126489	1073.6		57474	1238
				126297	1073.66		57216	1238.1
				126297	1073.72		58719	1238.14
				126264	1073.78		57729	1238.2
				126201	1073.86		56385	1238.24
				126138	1073.92		55203	1238.3
				126042	1073.96		55011	1238.42
				126009	1074.06		54882	1238.46
				125946	1074.1		54756	1238.5
				125883	1074.16		54723	1238.6
				125817	1074.22		54660	1238.64
				125787	1074.28		54693	1238.7
				125754	1074.36		54660	1238.74
				125721	1074.42		54627	1238.8
				125595	1074.46		54564	1238.92
				125499	1074.56		54468	1238.96
				125466	1074.6		54339	1239
				125403	1074.66		54276	1239.1
				125337	1074.72		54213	1239.14
				125307	1074.78		54147	1239.2
				125241	1074.86		54021	1239.24
				125178	1074.92		53829	1239.3
				125082	1074.96		53733	1239.42
				125019	1075.06		53670	1239.46
				124956	1075.1		53478	1239.5
				124890	1075.16		53445	1239.6
				124860	1075.22		53286	1239.64
				124764	1075.28		53190	1239.7
				124731	1075.36		53124	1239.74
				124635	1075.42		52839	1239.8
				124539	1075.46		52806	1239.92
				124506	1075.56		52743	1239.96
				124506	1075.6		52485	1240
				124380	1075.64		52389	1240.1
				124317	1075.74		52359	1240.14
				124284	1075.8		52230	1240.2
				124284	1075.86		52134	1240.24
				124155	1075.92		51912	1240.3
				124029	1075.96		51783	1240.42
				124029	1076.06		51720	1240.46
				123996	1076.1		51495	1240.5
				123837	1076.16		51399	1240.6
				123837	1076.22		51303	1240.64
				123771	1076.28		51240	1240.7
				123708	1076.36		51015	1240.74
				123708	1076.42		50889	1240.8
				123549	1076.46		50793	1240.92
				123582	1076.56		50727	1240.96
				123516	1076.6		50535	1241
				123390	1076.66		50472	1241.1
				123324	1076.72		50376	1241.14
				123294	1076.78		50250	1241.2
				123228	1076.86		50121	1241.24
				123198	1076.92		49896	1241.3
				123102	1076.96		49866	1241.42
				123036	1077.06		49737	1241.46
				122940	1077.1		49545	1241.5
				122877	1077.16		49449	1241.6
				122847	1077.22		49290	1241.64
				122781	1077.28		49227	1241.7
				122718	1077.36		49131	1241.74
				122685	1077.42		48873	1241.8
				122559	1077.46		48810	1241.92
				122493	1077.56		48714	1241.96
				122334	1077.66		48555	1242
				122334	1077.72		48426	1242.1
				122271	1077.78		48330	1242.14
				122271	1077.86		48234	1242.2
				122175	1077.92		48138	1242.24
				122079	1077.96		47883	1242.3
				122046	1078.06		47787	1242.42
				121983	1078.1		47691	1242.46
				121854	1078.16		47565	1242.5
				121824	1078.22		47436	1242.6
				121791	1078.28		47307	1242.64
				121728	1078.36		47244	1242.7
				121662	1078.42		47148	1242.74
				121566	1078.46		47052	1242.8
				121503	1078.56		47307	1242.92
				121440	1078.6		47403	1242.96
				121344	1078.64		46668	1243
				121281	1078.74		46446	1243.1
				121248	1078.8		46221	1243.14
				121185	1078.86		46125	1243.2
				121215	1078.92		45933	1243.24
				121089	1079		45741	1243.3
				120993	1079.06		45678	1243.42
				120993	1079.1		45645	1243.46
				120831	1079.16		45423	1243.5
				120831	1079.22		45423	1243.6
				120768	1079.28		45327	1243.64
				120735	1079.36		45294	1243.7
				120672	1079.42		45327	1243.74
				120513	1079.46		45039	1243.8
				120513	1079.56		44880	1243.92
				120480	1079.6		44784	1243.96
				120354	1079.66		44559	1244
				120321	1079.72		44463	1244.1
				120288	1079.78		44304	1244.14
				120192	1079.86		44175	1244.2
				120192	1079.92		44079	1244.24
				120033	1079.96		43761	1244.3
				120000	1080.06		43665	1244.42
				119970	1080.1		43569	1244.46
				119841	1080.16		43473	1244.5
				119811	1080.22		43440	1244.6
				119745	1080.28		43311	1244.64
				119715	1080.36		43311	1244.7
				119682	1080.42		43089	1244.74
				119586	1080.46		42864	1244.8
				119523	1080.56		42768	1244.92
				119490	1080.6		42672	1244.96
				119361	1080.66		42450	1245
				119331	1080.72		42384	1245.1
				119265	1080.78		42258	1245.14
				119235	1080.86		42162	1245.2
				119202	1080.92		42033	1245.24
				119076	1080.96		41778	1245.3
				119043	1081.06		41715	1245.42
				118980	1081.1		41682	1245.46
				118884	1081.16		41490	1245.5
				118884	1081.22		41394	1245.6
				118755	1081.28		41298	1245.64
				118755	1081.36		41202	1245.7
				118692	1081.42		41106	1245.74
				118530	1081.46		40884	1245.8
				118500	1081.56		40788	1245.92
				118467	1081.6		40692	1245.96
				118371	1081.66		40500	1246
				118371	1081.72		40371	1246.1
				118275	1081.78		40308	1246.14
				118212	1081.86		40212	1246.2
				118179	1081.92		40083	1246.24
				118020	1081.96		39828	1246.3
				118020	1082.06		39765	1246.42
				118020	1082.1		39699	1246.46
				117891	1082.16		39510	1246.5
				117828	1082.22		39444	1246.6
				117828	1082.28		39348	1246.64
				117699	1082.36		39285	1246.7
				117669	1082.42		39156	1246.74
				117573	1082.46		38868	1246.8
				117510	1082.56		38805	1246.92
				117540	1082.6		38679	1246.96
				117348	1082.66		38550	1247
				117318	1082.72		38421	1247.1
				117252	1082.78		38295	1247.14
				117252	1082.86		38199	1247.2
				117156	1082.92		38103	1247.24
				117060	1082.96		37878	1247.3
				116997	1083.06		37845	1247.42
				116964	1083.1		37719	1247.46
				116901	1083.16		37560	1247.5
				116838	1083.22		37398	1247.6
				116775	1083.28		37302	1247.64
				116742	1083.36		37272	1247.7
				116679	1083.42		37110	1247.74
				116550	1083.46		36888	1247.8
				116517	1083.56		36792	1247.92
				116517	1083.6		36759	1247.96
				116358	1083.66		36537	1248
				116358	1083.72		36504	1248.1
				116262	1083.78		36312	1248.14
				116229	1083.86		36249	1248.2
				116199	1083.92		36087	1248.24
				116040	1083.96		35928	1248.3
				116007	1084.06		35769	1248.42
				115944	1084.1		35706	1248.46
				115848	1084.16		35544	1248.5
				115782	1084.22		35481	1248.6
				115752	1084.28		35322	1248.64
				115719	1084.36		35226	1248.7
				115686	1084.42		35160	1248.74
				115494	1084.46		34905	1248.8
				115527	1084.56		34779	1248.92
				115494	1084.6		34713	1248.96
				115368	1084.66		34491	1249
				115335	1084.72		34425	1249.1
				115239	1084.78		34299	1249.14
				115239	1084.86		34299	1249.2
				115176	1084.92		34140	1249.24
				115047	1084.96		33915	1249.3
				114984	1085.06		33819	1249.42
				114984	1085.1		33756	1249.46
				114888	1085.16		33435	1249.5
				114825	1085.22		33435	1249.6
				114792	1085.28		33339	1249.64
				114696	1085.36		33243	1249.7
				114663	1085.42		33117	1249.74
				114537	1085.46		32925	1249.8
				114474	1085.56		32763	1249.92
				114474	1085.6		32733	1249.96
				114345	1085.66		32508	1250
				114378	1085.72		32445	1250.1
				114249	1085.78		32349	1250.14
				114216	1085.86		32220	1250.2
				114186	1085.92		32157	1250.24
				114024	1085.96		31932	1250.3
				113994	1086.06		31836	1250.42
				113928	1086.1		31740	1250.46
				113835	1086.16		31581	1250.5
				113802	1086.22		31455	1250.6
				113769	1086.28		31326	1250.64
				113706	1086.36		31263	1250.7
				113673	1086.42		31101	1250.74
				113547	1086.46		31005	1250.8
				113481	1086.56		30942	1250.92
				113514	1086.6		30846	1250.96
				113385	1086.66		30591	1251
				113385	1086.72		30528	1251.1
				113259	1086.78		30366	1251.14
				113289	1086.86		30303	1251.2
				113226	1086.92		30144	1251.24
				113034	1086.96		29886	1251.3
				113034	1087.06		29760	1251.42
				113004	1087.1		29727	1251.46
				112908	1087.16		29505	1251.5
				112842	1087.22		29439	1251.6
				112779	1087.28		29313	1251.64
				112746	1087.36		29247	1251.7
				112650	1087.42		29121	1251.74
				112524	1087.46		28863	1251.8
				112491	1087.56		28737	1251.92
				112491	1087.6		28704	1251.96
				112428	1087.66		28449	1252
				112332	1087.72		28386	1252.1
				112269	1087.78		28257	1252.14
				112203	1087.86		28161	1252.2
				112140	1087.92		28032	1252.24
				112077	1087.96		27810	1252.3
				112044	1088.06		27777	1252.42
				111981	1088.1		27747	1252.46
				111852	1088.16		27522	1252.5
				111852	1088.22		27426	1252.6
				111789	1088.28		27297	1252.64
				111723	1088.36		27201	1252.7
				111723	1088.42		27075	1252.74
				111564	1088.46		26916	1252.8
				111534	1088.56		26787	1252.92
				111468	1088.6		26691	1252.96
				111372	1088.66		26466	1253
				111342	1088.72		26403	1253.1
				111309	1088.78		26274	1253.14
				111213	1088.86		26274	1253.2
				111180	1088.92		26085	1253.24
				111054	1088.96		25923	1253.3
				111021	1089.06		25764	1253.42
				111021	1089.1		25701	1253.46
				110892	1089.16		25509	1253.5
				110829	1089.22		25509	1253.6
				110766	1089.28		25317	1253.64
				110766	1089.36		25251	1253.7
				110670	1089.42		25092	1253.74
				110607	1089.5		24870	1253.8
				110511	1089.56		24774	1253.92
				110478	1089.6		24678	1253.96
				110382	1089.66		24516	1254
				110349	1089.72		24420	1254.1
				110253	1089.78		24294	1254.14
				110190	1089.86		24231	1254.2
				110190	1089.92		24102	1254.24
				110094	1089.96		23877	1254.3
				110031	1090.06		23814	1254.42
				109968	1090.1		23751	1254.46
				109806	1090.16		23526	1254.5
				109806	1090.22		23400	1254.6
				109743	1090.28		23304	1254.64
				109710	1090.36		23238	1254.7
				109680	1090.42		23142	1254.74
				109518	1090.46		22920	1254.8
				109518	1090.56		22791	1254.92
				109488	1090.6		22728	1254.96
				109392	1090.66		22566	1255
				109329	1090.72		22440	1255.1
				109263	1090.78		22344	1255.14
				109167	1090.86		22248	1255.2
				109167	1090.92		22152	1255.24
				109041	1090.96		21864	1255.3
				108975	1091.06		21831	1255.42
				108912	1091.1		21735	1255.46
				108849	1091.16		21513	1255.5
				108816	1091.22		21417	1255.6
				108783	1091.28		21354	1255.64
				108753	1091.36		21288	1255.7
				108657	1091.42		21129	1255.74
				108498	1091.5		20904	1255.8
				108528	1091.56		20841	1255.92
				108498	1091.6		20715	1255.96
				108369	1091.66		20523	1256
				108306	1091.72		20457	1256.1
				108240	1091.78		20331	1256.14
				108210	1091.86		20235	1256.2
				108114	1091.92		20106	1256.24
				108018	1092		19851	1256.3
				108018	1092.06		19818	1256.42
				107952	1092.1		19722	1256.46
				107922	1092.16		19530	1256.5
				107826	1092.22		19500	1256.6
				107793	1092.28		19371	1256.64
				107730	1092.36		19275	1256.7
				107667	1092.42		19242	1256.74
				107538	1092.5		18891	1256.8
				107505	1092.56		18861	1256.92
				107505	1092.6		18765	1256.96
				107409	1092.66		18540	1257
				107313	1092.72		18444	1257.1
				107283	1092.78		18348	1257.16
				107250	1092.86		18219	1257.22
				107187	1092.92		18093	1257.28
				107058	1093		17934	1257.32
				106995	1093.06		17772	1257.42
				106995	1093.1		17742	1257.46
				106866	1093.16		17517	1257.5
				106836	1093.22		17421	1257.6
				106803	1093.28		17325	1257.66
				106740	1093.36		17229	1257.72
				106644	1093.42		17133	1257.78
				106548	1093.46		16878	1257.82
				106515	1093.56		16782	1257.92
				106419	1093.6		16719	1257.96
				106356	1093.66		16494	1258
				106293	1093.72		16431	1258.1
				106260	1093.78		16335	1258.14
				106197	1093.86		16239	1258.2
				106131	1093.92		16143	1258.24
				106035	1094		15888	1258.3
				106035	1094.06		15792	1258.42
				106005	1094.1		15696	1258.46
				105909	1094.16		15534	1258.5
				105813	1094.22		15438	1258.6
				105747	1094.28		15345	1258.66
				105684	1094.36		15216	1258.72
				105651	1094.42		15153	1258.78
				105588	1094.5		14895	1258.82
				105492	1094.56		14832	1258.92
				105492	1094.6		14769	1258.96
				105366	1094.66		14544	1259
				105333	1094.72		14481	1259.1
				105270	1094.78		14322	1259.16
				105204	1094.86		14256	1259.22
				105141	1094.92		14160	1259.28
				105078	1094.96		13938	1259.32
				105012	1095.06		13842	1259.42
				104982	1095.1		13713	1259.46
				104823	1095.16		13554	1259.5
				104790	1095.22		13458	1259.6
				104790	1095.28		13329	1259.66
				104661	1095.36		13299	1259.72
				104598	1095.42		13170	1259.78
				104598	1095.5		13011	1259.82
				104535	1095.56		12882	1259.92
				104535	1095.6		12753	1259.96
				104373	1095.66		12564	1260
				104310	1095.72		12468	1260.1
				104214	1095.78		12435	1260.16
				104181	1095.86		12372	1260.22
				104118	1095.92		12210	1260.28
				103992	1096		11955	1260.32
				104055	1096.06		11922	1260.42
				103992	1096.1		11796	1260.46
				103863	1096.16		11700	1260.5
				103800	1096.22		11604	1260.6
				103767	1096.28		11508	1260.66
				103704	1096.36		11379	1260.72
				103608	1096.42		11253	1260.78
				103542	1096.5		11091	1260.82
				103542	1096.56		10932	1260.96
				103479	1096.6		10677	1261
				103350	1096.66		10614	1261.1
				103287	1096.72		10677	1261.16
				103257	1096.78		10836	1261.22
				103191	1096.86		10677	1261.28
				103161	1096.92		10389	1261.36
				103065	1096.96		10422	1261.42
				103065	1097.06		10293	1261.46
				102999	1097.1		9879	1261.5
				102903	1097.16		9687	1261.6
				102807	1097.22		9399	1261.66
				102744	1097.28		9237	1261.72
				102648	1097.36		8856	1261.78
				102648	1097.42		8664	1261.82
				102522	1097.46		8535	1261.92
				102522	1097.56		8439	1261.96
				102456	1097.6		8310	1262
				102360	1097.66		8184	1262.1
				102297	1097.72		8088	1262.16
				102264	1097.78		8025	1262.22
				102138	1097.86		7959	1262.28
				102138	1097.92		7737	1262.36
				102042	1098		7671	1262.42
				101976	1098.06		7608	1262.46
				101946	1098.1		7449	1262.5
				101913	1098.16		7353	1262.6
				101787	1098.22		7320	1262.66
				101817	1098.28		7224	1262.72
				101658	1098.36		7065	1262.78
				101658	1098.42		6840	1262.82
				101562	1098.46		6714	1262.92
				101529	1098.56		6681	1262.96
				101433	1098.6		6522	1263
				101403	1098.66		6456	1263.1
				101337	1098.72		6330	1263.16
				101241	1098.78		6234	1263.22
				101178	1098.86		6138	1263.28
				101178	1098.92		5913	1263.36
				101052	1098.96		5817	1263.42
				101019	1099.06		5817	1263.46
				100986	1099.1		5625	1263.5
				100923	1099.16		5625	1263.6
				100923	1099.22		5529	1263.66
				100794	1099.28		5466	1263.72
				100764	1099.36		5340	1263.78
				100635	1099.42		5148	1263.82
				100572	1099.5		5052	1263.92
				100506	1099.56		4986	1263.96
				100443	1099.6		4860	1264
				100380	1099.66		4764	1264.1
				100347	1099.72		4764	1264.16
				100251	1099.78		4698	1264.22
				100188	1099.86		4539	1264.28
				100188	1099.92		4221	1264.36
				100059	1100		4188	1264.42
				100029	1100.06		4125	1264.46
				99996	1100.1		3900	1264.5
				99867	1100.16		3771	1264.6
				99837	1100.22		3708	1264.66
				99804	1100.28		3708	1264.72
				99675	1100.36		3549	1264.78
				99645	1100.42		3294	1264.86
				99582	1100.46		3198	1264.92
				99486	1100.56		3102	1264.96
				99453	1100.6		2877	1265
				99357	1100.66		2751	1265.1
				99324	1100.72		2589	1265.16
				99228	1100.78		2463	1265.22
				99198	1100.86		2367	1265.28
				99198	1100.92		2079	1265.32
				99036	1100.96		1983	1265.42
				98973	1101.06		1854	1265.46
				98973	1101.1		1824	1265.5
				98910	1101.16		1791	1265.6
				98844	1101.22		1728	1265.66
				98751	1101.28		1632	1265.72
				98718	1101.36		1632	1265.78
				98622	1101.42		1344	1265.82
				98589	1101.5		1344	1265.86
				98526	1101.56		1344	1265.86
				98493	1101.6		1278	1265.92
				98367	1101.66		1086	1266.08
				98334	1101.72		768	1266.14
				98205	1101.78		672	1266.2
				98205	1101.86		609	1266.24
				98175	1101.92		384	1266.3
				98046	1101.96		288	1266.42
				97950	1102.06		192	1266.46
				97950	1102.1		96	1266.5
				97887	1102.16		66	1266.6
				97791	1102.22
				97728	1102.28
				97695	1102.36
				97695	1102.42
				97536	1102.5
				97470	1102.56
				97440	1102.6
				97344	1102.66
				97311	1102.72
				97215	1102.78
				97185	1102.86
				97185	1102.92
				97023	1102.96
				97056	1103.06
				96960	1103.1
				96864	1103.16
				96768	1103.22
				96735	1103.28
				96672	1103.36
				96639	1103.42
				96546	1103.5
				96513	1103.56
				96450	1103.6
				96384	1103.66
				96288	1103.72
				96225	1103.78
				96192	1103.86
				96129	1103.92
				96033	1103.96
				96000	1104.06
				95970	1104.1
				95874	1104.16
				95778	1104.22
				95778	1104.28
				95715	1104.36
				95649	1104.42
				95523	1104.5
				95490	1104.56
				95457	1104.6
				95361	1104.66
				95298	1104.72
				95265	1104.78
				95169	1104.86
				95169	1104.92
				95076	1104.96
				95043	1105.06
				95010	1105.1
				94947	1105.16
				94851	1105.22
				94755	1105.28
				94692	1105.36
				94659	1105.42
				94530	1105.46
				94500	1105.56
				94500	1105.6
				94371	1105.66
				94308	1105.72
				94245	1105.78
				94212	1105.86
				94149	1105.92
				94083	1106
				94020	1106.06
				93987	1106.1
				93861	1106.16
				93828	1106.22
				93765	1106.28
				93732	1106.36
				93636	1106.42
				93540	1106.5
				93510	1106.56
				93477	1106.6
				93381	1106.66
				93285	1106.72
				93252	1106.78
				93222	1106.86
				93156	1106.92
				93060	1107
				93060	1107.06
				92964	1107.1
				92868	1107.16
				92838	1107.22
				92742	1107.28
				92709	1107.36
				92646	1107.42
				92550	1107.5
				92517	1107.56
				92487	1107.6
				92358	1107.66
				92325	1107.72
				92199	1107.78
				92166	1107.86
				92133	1107.92
				92040	1108
				92007	1108.06
				91944	1108.1
				91878	1108.16
				91815	1108.22
				91752	1108.28
				91686	1108.36
				91590	1108.42
				91494	1108.5
				91494	1108.56
				91494	1108.6
				91368	1108.66
				91305	1108.72
				91239	1108.78
				91209	1108.86
				91047	1109
				91047	1109.06
				90951	1109.1
				90855	1109.16
				90855	1109.22
				90729	1109.28
				90663	1109.36
				90633	1109.42
				90537	1109.5
				90504	1109.56
				90441	1109.6
				90345	1109.66
				90249	1109.72
				90249	1109.78
				90153	1109.86
				90153	1109.92
				90024	1110
				90024	1110.06
				89994	1110.1
				89832	1110.16
				89802	1110.22
				89769	1110.28
				89706	1110.36
				89643	1110.42
				89547	1110.5
				89514	1110.56
				89451	1110.6
				89385	1110.66
				89322	1110.72
				89259	1110.78
				89193	1110.86
				89163	1110.92
				89034	1111
				89034	1111.06
				88938	1111.1
				88908	1111.16
				88842	1111.22
				88716	1111.28
				88620	1111.36
				88683	1111.42
				88524	1111.5
				88524	1111.56
				88458	1111.6
				88362	1111.66
				88269	1111.72
				88236	1111.78
				88203	1111.86
				88140	1111.92
				88077	1112
				88011	1112.06
				87981	1112.1
				87885	1112.16
				87819	1112.22
				87756	1112.28
				87723	1112.36
				87693	1112.42
				87597	1112.5
				87564	1112.56
				87438	1112.6
				87405	1112.66
				87309	1112.72
				87246	1112.78
				87180	1112.86
				87180	1112.92
				87021	1112.96
				87021	1113.02
				86925	1113.08
				86892	1113.18
				86829	1113.22
				86733	1113.28
				86703	1113.36
				86670	1113.42
				86511	1113.46
				86478	1113.52
				86478	1113.58
				86382	1113.68
				86319	1113.72
				86253	1113.78
				86223	1113.86
				86190	1113.92
				86157	1113.96
				86064	1114.02
				85968	1114.08
				85839	1114.18
				85806	1114.22
				85710	1114.28
				85680	1114.36
				85647	1114.42
				85584	1114.46
				85488	1114.52
				85488	1114.58
				85296	1114.68
				85263	1114.72
				85233	1114.78
				85167	1114.86
				85104	1114.92
				85071	1115
				85008	1115.06
				84945	1115.1
				84912	1115.16
				84816	1115.22
				84720	1115.28
				84720	1115.36
				84528	1115.42
				84591	1115.46
				84624	1115.52
				84561	1115.58
				84369	1115.68
				84273	1115.72
				84273	1115.78
				84210	1115.86
				84144	1115.92
				84018	1115.96
				83985	1116.02
				83985	1116.08
				83856	1116.18
				83793	1116.22
				83730	1116.28
				83730	1116.36
				83667	1116.42
				83571	1116.46
				83538	1116.52
				83538	1116.58
				83313	1116.68
				83250	1116.72
				83091	1116.78
				83217	1116.86
				83313	1116.92
				83091	1116.96
				83028	1117.02
				82932	1117.08
				82899	1117.18
				82836	1117.22
				82770	1117.28
				82611	1117.36
				82548	1117.42
				82548	1117.46
				82548	1117.52
				82548	1117.58
				82386	1117.68
				82323	1117.72
				82293	1117.78
				82227	1117.86
				82035	1117.92
				82101	1117.96
				82101	1118.02
				82035	1118.08
				81972	1118.18
				81747	1118.22
				81684	1118.28
				81621	1118.36
				81621	1118.42
				81621	1118.46
				81525	1118.52
				81462	1118.58
				81525	1118.68
				81366	1118.72
				81237	1118.78
				81204	1118.86
				81108	1118.92
				81078	1118.96
				81045	1119.02
				80949	1119.08
				80853	1119.18
				80790	1119.22
				80727	1119.28
				80661	1119.36
				80661	1119.42
				80535	1119.46
				80535	1119.52
				80469	1119.58
				80373	1119.68
				80310	1119.72
				80214	1119.78
				80214	1119.86
				80151	1119.92
				80055	1119.96
				80022	1120.02
				79896	1120.08
				79830	1120.18
				79800	1120.22
				79767	1120.28
				79704	1120.36
				79671	1120.42
				79512	1120.46
				79479	1120.52
				79479	1120.58
				79350	1120.68
				79287	1120.72
				79191	1120.78
				79191	1120.86
				79065	1120.92
				79065	1120.96
				79032	1121.02
				78969	1121.08
				78840	1121.18
				78840	1121.22
				78777	1121.28
				78681	1121.36
				78648	1121.42
				78522	1121.46
				78522	1121.52
				78456	1121.58
				78360	1121.68
				78297	1121.72
				78297	1121.78
				78264	1121.86
				78168	1121.92
				78042	1121.96
				78042	1122.02
				78009	1122.08
				77913	1122.18
				77817	1122.22
				77721	1122.28
				77691	1122.36
				77721	1122.42
				77562	1122.46
				77529	1122.52
				77466	1122.58
				77403	1122.68
				77337	1122.72
				77241	1122.78
				77211	1122.86
				77211	1122.92
				77019	1122.96
				76956	1123.02
				76956	1123.08
				76827	1123.18
				76794	1123.22
				76764	1123.28
				76731	1123.36
				76635	1123.42
				76572	1123.46
				76539	1123.52
				76476	1123.58
				76380	1123.68
				76314	1123.72
				76314	1123.78
				76188	1123.86
				76155	1123.92
				76059	1123.96
				75996	1124.02
				75996	1124.08
				75933	1124.18
				75867	1124.22
				75741	1124.28
				75708	1124.36
				75612	1124.42
				75549	1124.46
				75516	1124.52
				75486	1124.58
				75390	1124.68
				75324	1124.72
				75294	1124.78
				75228	1124.86
				75165	1124.92
				75102	1124.96
				75036	1125.02
				74973	1125.08
				74877	1125.18
				74814	1125.22
[truncated: 1,221 more rows]
